# Supplementary material
Source: HighWire-hosted journal article supplement (https://thorax.bmj.com/content/71/11/1039)
Supplement: inline-supplementary-material-1 [file inline-supplementary-material-1.pdf]

## **ONLINE SUPPLEMENT**

### **MATERIALS AND METHODS**

#### **Monocyte and neutrophil isolation**

Peripheral blood was collected from volunteers and neutrophils and monocytes were isolated using a modified standard protocol. Briefly, 40mL of blood was mixed with 10mL acid citrate dextrose (ACD). Ten millilitres of phosphate buffered saline (PBS) (Gibco, Carlsbad, CA, USA) and 6mL of 10% dextran (MP Biomedicals, Santa Ana, CA, USA) were added and sedimentation was allowed to occur at room temperature for 20 minutes. The upper layer was removed, overlaid on Ficoll Paque-PLUS (GE Healthcare, Little Chalfont, UK) and centrifuged at 490xg for 10 minutes. The buffy coat containing monocytes was isolated and incubated with CD14 magnetic beads (Miltenyi Biotec, Bergisch, Germany) for 15 minutes at 4°C. The cell pellet containing neutrophils was resuspended in sterile water for 30 seconds to lyse remaining red blood cells before osmolarity was re-established with equal parts of 2x PBS. Cells were then incubated for 30 minutes at 4°C with CD16 magnetic beads (Miltenyi Biotec). Magnetically labelled cells (CD14<sup>+</sup> monocytes and CD16<sup>+</sup> neutrophils) were run separately through magnetic columns as per the manufacturer's instructions to positively select out each cell type. Typical purity for each cell population was 99% or greater assessed by microscopy.

#### **Confirmation of neutralising activity of anti-TGF-β1 antibodies**

Primary airway smooth muscle (ASM) cells were seeded in 12 well plates at  $6.4 \times 10^4$  cells per well in 5% FBS DMEM (Gibco) for 24 hours. Cells were then quiesced for 24 hours in 0.1% BSA (Sigma Aldrich) DMEM before stimulation with TGF-β1 (0.3ng/mL) (R&D Systems) in the presence or absence of anti-TGF-β1 antibodies (1.5μg/mL) (R&D Systems) for 24 hours at 37°C with 5% CO<sub>2</sub>. After 24 hours, cell-free supernatant was collected and stored at -80°C for analysis.

### **Detection of PGE<sub>2</sub>**

PGE<sub>2</sub> was detected in supernatants from previous experiments where monocytes and neutrophils were treated with indomethacin (10<sup>-6</sup>M). A PGE<sub>2</sub> ELISA kit (Cayman Chemical, Ann Arbor, MI, USA) was used as per the manufacturer's instructions. Detection limit was 7.8pg/mL.

### **Quantitative PCR (qPCR)**

IL-6, CXCL8, IFN- $\alpha$ , IFN- $\beta$ , IL-28, IL-29A, TNF- $\alpha$  and VEGF mRNA expression was detected using qPCR. Total cellular RNA was isolated using the NucleoSpin® RNA kit (Machery Nagel, Düren, Germany) according to the manufacturer's instructions. 80ng of total RNA was converted to cDNA using MMLV-RV reaction kits (Invitrogen, Carlsbad, CA, USA). qPCR was carried out on cDNA using the StepOne™ Real-Time PCR system (Applied Biosystems, Carlsbad, CA, USA) using Taqman Gene Expression Assays (Applied Biosystems). Assays were carried out in triplicate using a multiplexed reaction mixture containing the primer and probes for the target genes (IL-6, CXCL8, IFN- $\alpha$ , IFN- $\beta$ , IL-28, IL-29A, TNF- $\alpha$ , VEGF) and for ubiquitously expressed ribosomal RNA (18S rRNA) as a housekeeping gene. Relative expression was normalised to 18S rRNA expression and quantification performed using the  $2^{-\Delta\Delta CT}$  method.

### **SUPPLEMENTARY FIGURES**

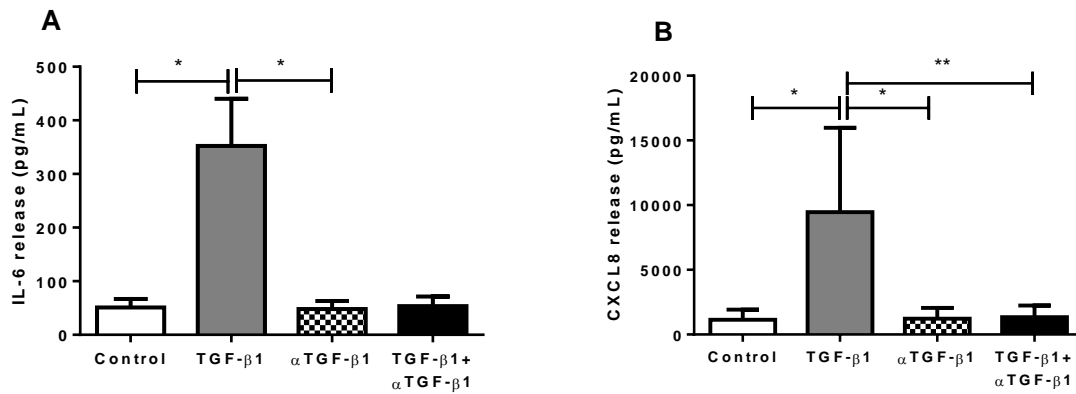

**Figure S1. Anti-TGF-β1 antibodies neutralise recombinant TGF-β1 to prevent cytokine release from primary airway smooth muscle cells.** (A) IL-6 and (B) CXCL8 release from TGF-β1 (0.3ng/mL) stimulated primary airway smooth muscle cells in the presence or absence of neutralising anti-TGF-β1 antibodies (1.5μg/mL) after 24h (n=6). Data are presented as mean±SEM. \*p<0.05, \*\*p<0.01.

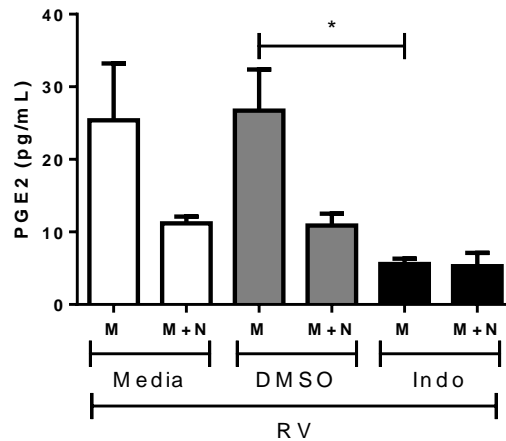

**Figure S2. Indomethacin prevents the generation of PGE<sub>2</sub> from monocytes stimulated with RV16.** PGE<sub>2</sub> release from monocytes and monocytes co-cultured with neutrophils in media alone, DMSO vehicle control and indomethacin (10<sup>-6</sup>M) and stimulated with RV16 (MOI1) after 24h (n=4). Data are presented as mean±SEM. \*p<0.05.

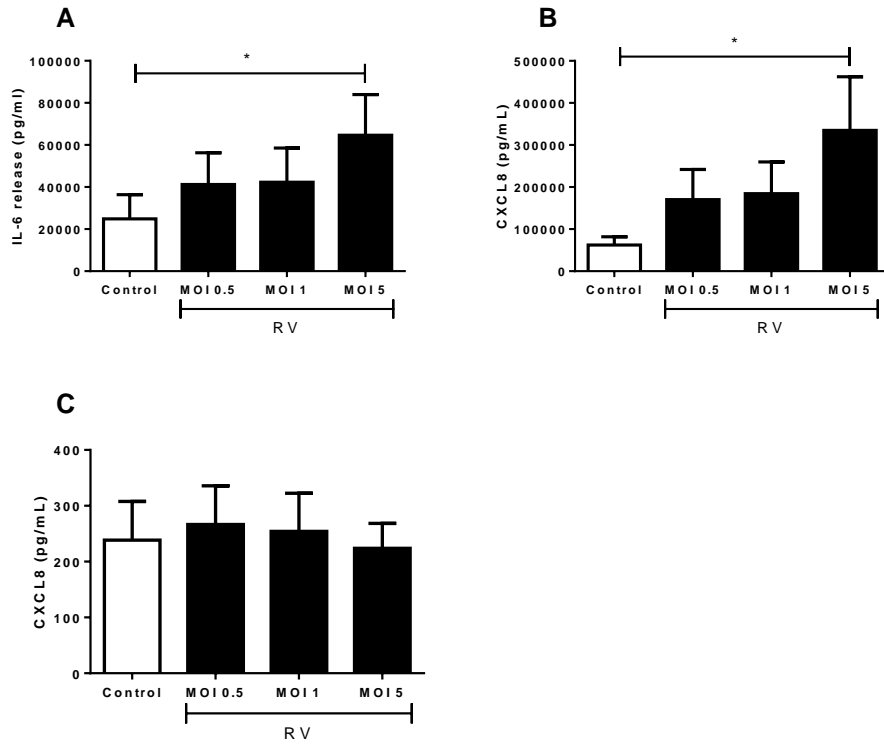

**Figure S3. Concentration dependant effects of RV16 on monocytes and neutrophils.** (A) IL-6 and (B&C) CXCL8 release from monocytes (A&B) and neutrophils (C) stimulated with RV16 (MOI0.5-5) after 24h (n=3-4). Data are presented as mean±SEM. \*p<0.05.
